# Supplementary material for: DSC Phase Transition Profiles Analyzed by Control Charts to Determine Markers for the Authenticity and Deterioration of Flaxseed Oil during Storage
Source: MDPI journal article supplement (doi:10.3390/foods12152954), 2023-08-04
Supplement: s1 [file s1]

## DSC phase transition profiles analyzed by control charts to determine markers for the authenticity and deterioration of flaxseed oil during storage

Mahbuba Islam <sup>1</sup>, Anna Kaczmarek <sup>1</sup>, Anna Grygier <sup>2</sup> and Jolanta Tomaszewska-Gras <sup>1,\*</sup>

<sup>1</sup> Department of Food Quality and Safety Management, Poznań University of Life Sciences, ul. Wojska Polskiego 31/33, 60-624 Poznań, Poland; mahbuba.islam@up.poznan.pl (M.I.); anna.kaczmarek@up.poznan.pl (A.K.)

<sup>2</sup> Department of Food Technology of Plant Origin, Poznań University of Life Sciences, ul. Wojska Polskiego 31/33, 60-624 Poznań, Poland; anna.grygier@up.poznan.pl

\* Correspondence: jolanta.tomaszewska-gras@up.poznan.pl

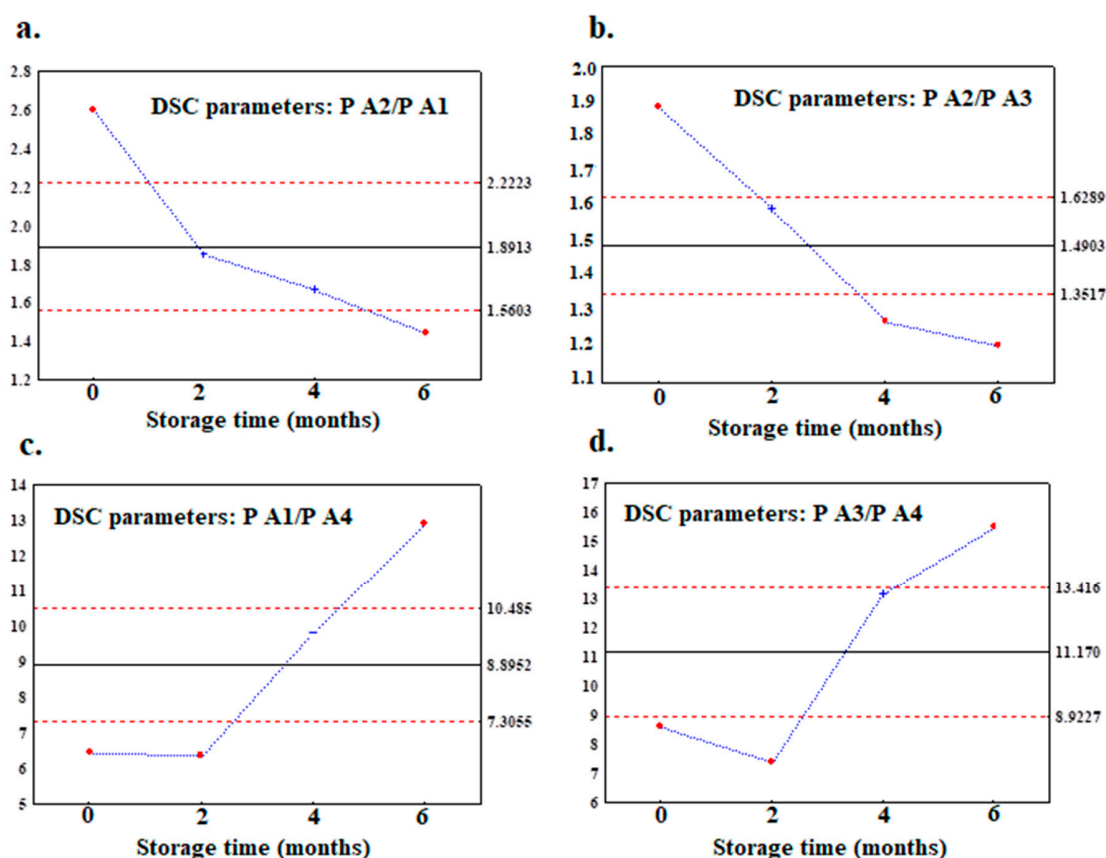

**Figure S1.** Control charts of unstable parameters (calculated from the ratio of peak's percentage of area) from DSC melting curves. (a) ratio of parameters P A2/P A1, (b) ratio of parameters P A2/P A3, (c) ratio of parameters P A1/P A4, (d) ratio of parameters P A3/P A4.
